# Supplementary material for: Effects of intraovarian injection of autologous platelet rich plasma on ovarian reserve and IVF outcome parameters in women with primary ovarian insufficiency
Source: publisher site journal article supplement (doi:10.18632/aging.103403), 2020-06-05
Supplement: Supplementary file [file aging-v12i11-103403-supplementary-material-SD1.pdf]

## SUPPLEMENTARY TABLE

Supplementary Table 1. Characteristics of 23 women who had spontaneous pregnancy following PRP injection.

|                           | <b>Mean ± SD</b> |
|---------------------------|------------------|
| Age                       | 34.6 ± 4.0       |
| Duration of infertility   | 5.6 ± 3.4        |
| Prior IVF attempts        | 2.6 ± 2.1        |
| FSH (mIU/mL) prior to PRP | 33.3 ± 8.9       |
| AMH (ng/ml) prior to PRP  | 0.09 ± 0.07      |
| AFC prior to PRP          | 1.26 ± 0.8       |
